# Supplementary material for: Evaluating Synthetic Activation and Repression of Neuropsychiatric-Related Genes in hiPSC-Derived NPCs, Neurons, and Astrocytes
Source: PubMed Central journal article supplement — Stem Cell Reports. 2017 Jul 27;9(2):615–28. doi: 10.1016/j.stemcr.2017.06.012 (PMC5550013; doi:10.1016/j.stemcr.2017.06.012), 2017-07-27
Supplement: mmc1.pdf [file mmc1.pdf]

**Stem Cell Reports, Volume 9**

**Supplemental Information**

**Evaluating Synthetic Activation and Repression of Neuropsychiatric-Related Genes in hiPSC-Derived NPCs, Neurons, and Astrocytes**

**Seok-Man Ho, Brigham J. Hartley, Erin Flaherty, Prashanth Rajarajan, Rawan Abdelaal, Ifeanyi Obiorah, Natalie Barretto, Hamza Muhammad, Hemali P. Phatnani, Shahram Akbarian, and Kristen J. Brennand**

## SUPPLEMENTAL INFORMATION

### SUPPLEMENTAL FIGURES

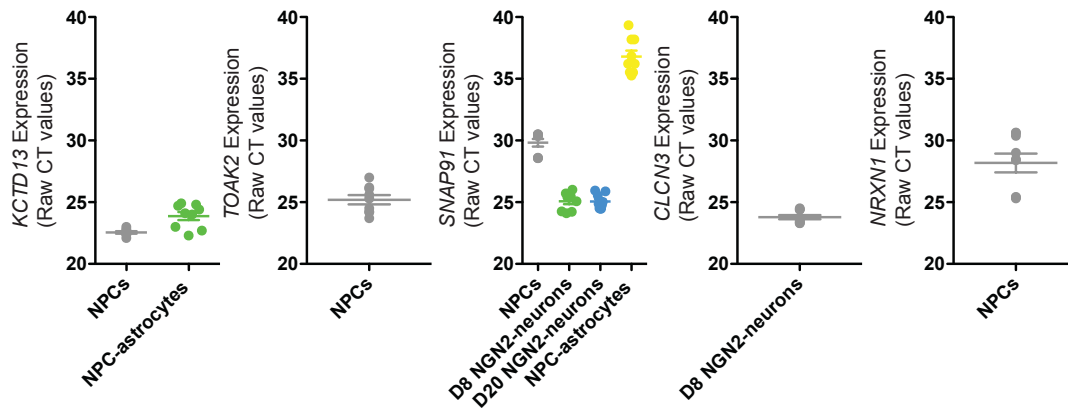

**SI Figure 1. Baseline cell-type specific expression of SZ genes.** Raw CT scores indicating baseline *KCTD13*, *TOAK2*, *NRXN1*, *SNAP91* and *CLCN3* mRNA levels in NPCs (grey), 8-day *NGN2*-neurons (green), 20-day *NGN2*-neurons (blue) and NPC-astrocytes (yellow), as appropriate for the cell types evaluated for each gene. Data are presented as mean  $\pm$  s.e.m (bar graph) from at least 3 independent biological replicates. Each biological replicate is depicted by a circle.

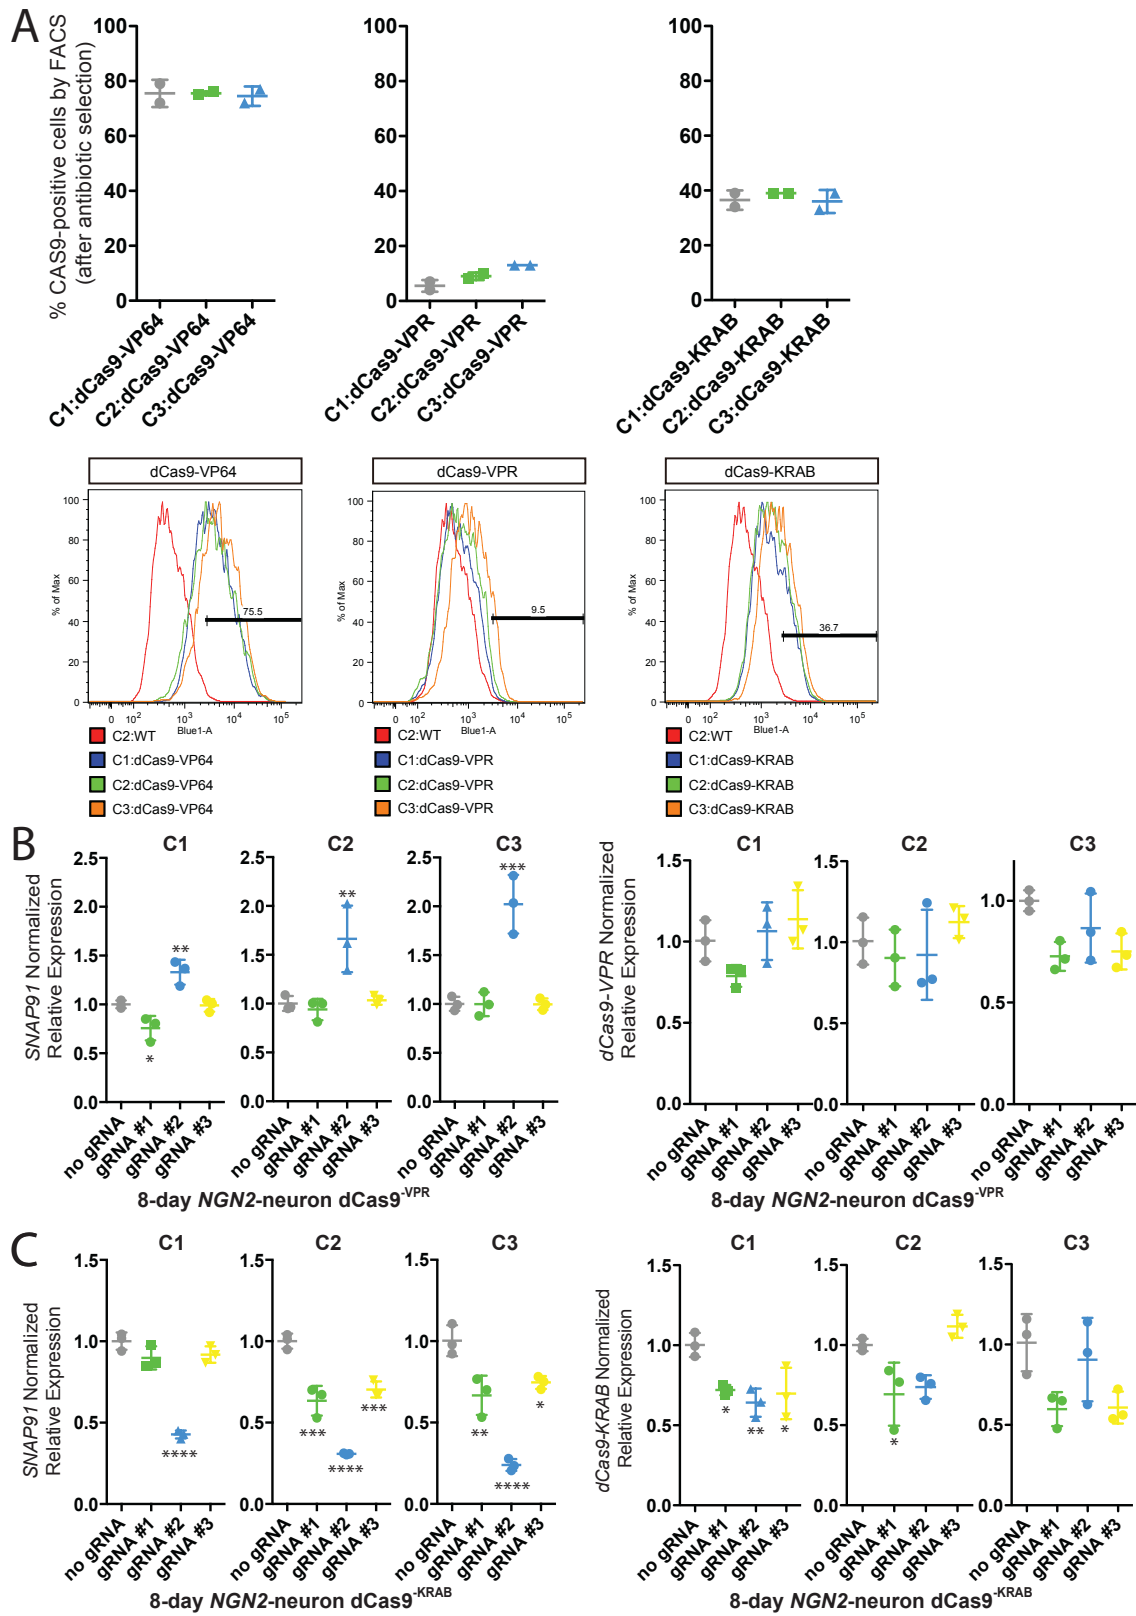

Cas9 protein in antibiotic selected dCas9<sup>-VP16</sup>, dCas9<sup>-VPR</sup> and dCas9<sup>-KRAB</sup> NPC lines, shown as graphs (top) and histogram plots (bottom). **B-C.** Normalized relative *SNAP91:dCas9* mRNA levels (compared to scrambled gRNA control (grey)) following transduction of dCas9<sup>VPR</sup> (**B**) and dCas9<sup>KRAB</sup> (**C**) 8-day NGN2-neurons with lentivirus expressing gRNAs targeted to three different locations (green, blue, yellow) upstream of the TSS for *SNAP91*. Data are presented as mean  $\pm$  s.e.m (bar graph) from at least 3 independent biological replicates. Each biological replicate is depicted by a circle. \*=p < 0.05, \*\*=p < 0.01, \*\*\*=p < 0.001, \*\*\*\*=p < 0.0001.

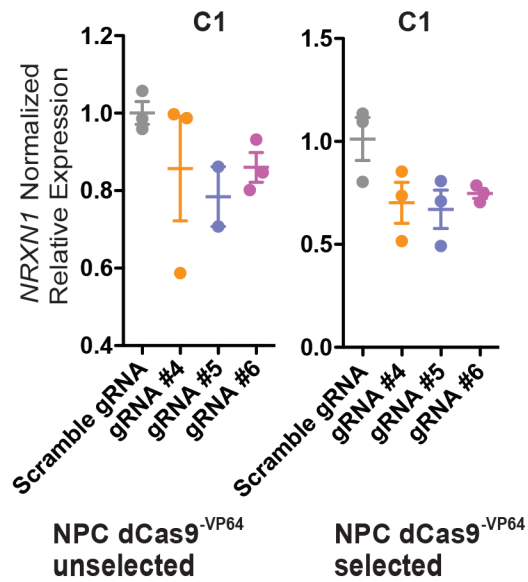

**SI Figure 3. Evaluation of impact of antibiotic selection for dCas9-VP64 on gRNA efficacy.** Normalized relative mRNA levels (compared to scrambled gRNA control (grey)) following transduction of dCas9<sup>VP64</sup> NPCs with lentivirus expressing gRNAs targeted to three different locations (green, blue, yellow) upstream of the TSS for *NRXN1*. Data are presented as mean  $\pm$  s.e.m (bar graph) from at least 3 independent biological replicates. Each biological replicate is depicted by a circle.

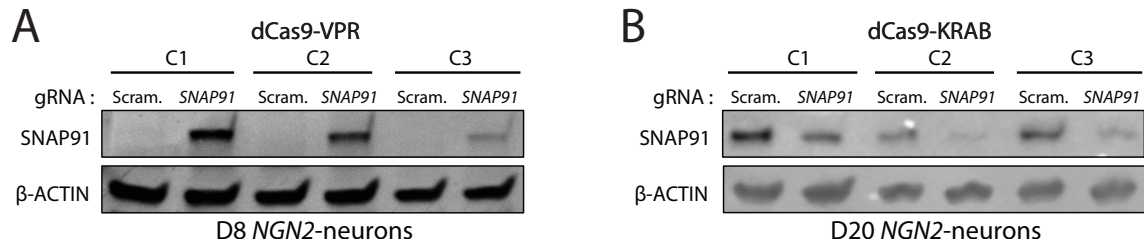

**SI Figure 4. Evaluation of changes in SNAP91 protein levels by dCas9<sup>VP64</sup> in NPCs. A.** Representative western blots following transduction of dCas9<sup>VP64</sup> NPCs with lentivirus expressing *SNAP91* gRNA#2, day 8 *NGN2*-neurons. **B.** Representative western blots following transduction of dCas9<sup>KRAB</sup> NPCs with lentivirus expressing *SNAP91* gRNA#2, day 21 *NGN2*-neurons.

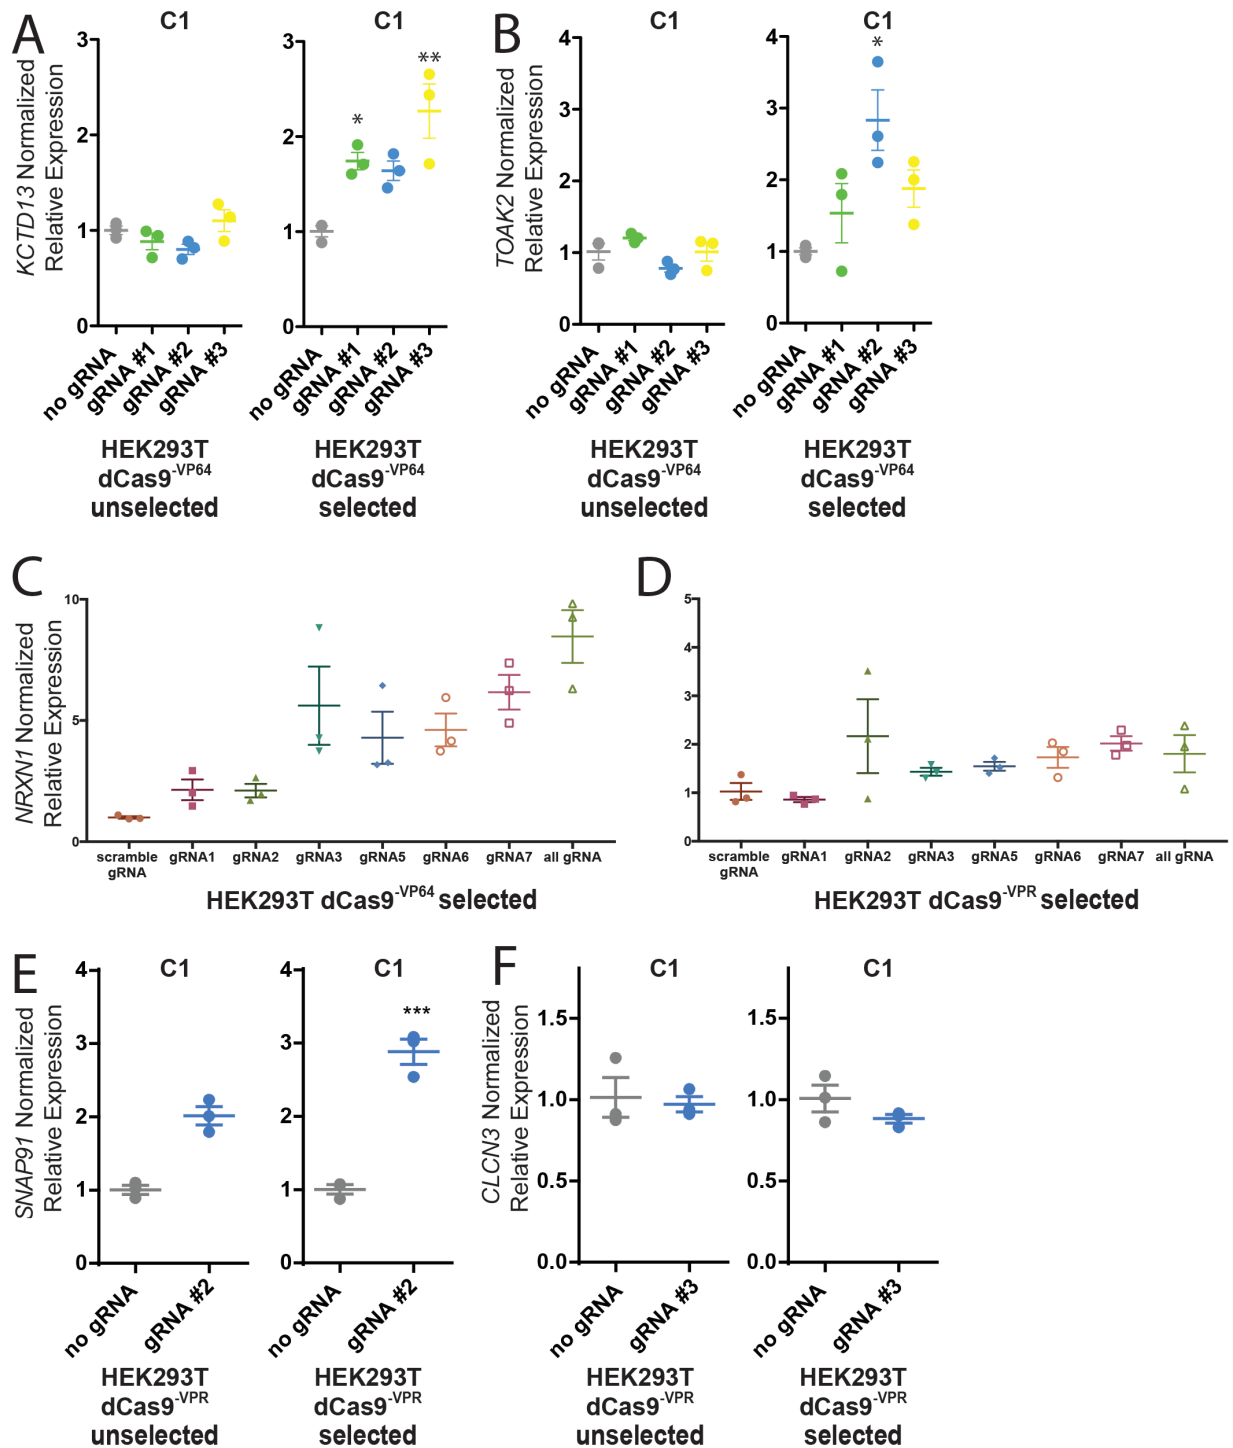

**SI Figure 5. Evaluation of impact of gRNA efficacy in HEK293Ts.** A-D. Normalized relative mRNA levels (compared to scrambled gRNA control (grey)) following transduction of antibiotic-selected and/or non-selected dCas9<sup>VP64</sup> (A-C) and dCas9<sup>VPR</sup> (D-F) HEK293Ts with lentivirus expressing gRNAs targeted to three to six different locations (green, blue, yellow, orange, purple and pink) upstream of the TSS for *KCTD13* (A), *TOAK2* (B), *NRXN1*

(C-D), *SNAP91* (E) and *CLCN3* (F). Data are presented as mean  $\pm$  s.e.m (bar graph) from at least 3 independent biological replicates. Each biological replicate is depicted by a circle. \*= $p < 0.05$ , \*\*= $p < 0.01$ , \*\*\*= $p < 0.001$ , \*\*\*\*= $p < 0.0001$ .



**SI Table 1. Control hiPSC NPC lines.**

| <b>ID</b> | <b>Source</b> | <b>Patient ID</b> | <b>Source Cell</b> | <b>Reprogramming method</b> | <b>NPC line</b>       | <b>Sex</b> | <b>Dx</b> | <b>Ethnicity</b>        | <b>Age at Biopsy</b> | <b>IQ</b> |
|-----------|---------------|-------------------|--------------------|-----------------------------|-----------------------|------------|-----------|-------------------------|----------------------|-----------|
| C1        | NIMH          | NSB553            | Fibroblast         | SV-KOSM                     | NSB553 hiPSC#S1 NPC#1 | M          | Control   | caucasian, non-Hispanic | 31                   | 127       |
| C2        | NIMH          | NSB2607           | Fibroblast         | SV-KOSM                     | NSB2607 hiPSC#1 NPC#4 | M          | Control   | caucasian, non-Hispanic | 15                   | 126       |
| C3        | NIMH          | NSB690            | Fibroblast         | SV-KOSM                     | NSB690 hiPSC#2 NPC#1  | M          | Control   | caucasian, non-Hispanic | 25                   | 115       |

**SI Table 2. gRNA sequences.**

| <b>gRNA Target</b>       | <b>Oligo Sequence</b>                |                                     |
|--------------------------|--------------------------------------|-------------------------------------|
| <i>hKCTD13</i> gRNA #1   | caccgGGAGCGCACGTCGACCCGCC            | aaacGGCGGGTCGACGTGCGCTCCc           |
| <i>hKCTD13</i> gRNA #2   | caccgGGTCGGCCGCATCCTCGATC            | aaacGATCGAGGATGCGGCCGACCc           |
| <i>hKCTD13</i> gRNA #3   | caccgAGCGCACGTCGACCCGCCCCG           | aaacCGGGCGGGTCGACGTGCGCTc           |
| <i>hTAOK2</i> gRNA #1    | caccgGCGCAAAGATTCCTCGCACT            | aaacAGTGCAGGAATCTTTGCGCc            |
| <i>hTAOK2</i> gRNA #2    | caccgGCGATCTGCGACTGCGCGCA            | aaacTGCGCGCAGTCGCAGATCGCc           |
| <i>hTAOK2</i> gRNA #3    | caccgGGCGATCTGCGACTGCGCGC            | aaacGCGCGCAGTCGCAGATCGCCc           |
| <i>hNRXN1</i> gRNA #1    | caccgCGTAGCCTACTGAGCATGCC            | aaacGGCATGCTCAGTAGGCTACGc           |
| <i>hNRXN1</i> gRNA #2    | caccgAGGAGTCGATAATTATGATG            | aaacCATCATAATTATCGACTCCTc           |
| <i>hNRXN1</i> gRNA #3    | caccgGCTCGGAACCCTTGAAAAGA            | aaacTCTTTTCAAGGGTTCCGAGCCc          |
| <i>hNRXN1</i> gRNA #4    | caccgCCGGGGCCGACAGGGTCAAATG          | aaacCATTTTGGACCCTGTGGCCCCGGc        |
| <i>hNRXN1</i> gRNA #5    | caccgCAGTGGTACAGGGTAGCCACAGA         | aaacTCTGTGGCTACCCTGTACCACTGc        |
| <i>hNRXN1</i> gRNA #6    | caccgCCAGAGCCTGAAGCATGCATCGG         | aaacCCGATGCATGCTTCAGGCTCTGGc        |
| <i>hSNAP91</i> gRNA #1   | caccgGCGCGACGACGCCCTTGCCT            | aaacAGGCAAGGGCGTTCGTGCGGc           |
| <i>hSNAP91</i> gRNA #2   | caccgGACGGTCGCGGATGGCCGGC            | aaacGCCGGCCATCCGCGACCGTCCc          |
| <i>hSNAP91</i> gRNA #3   | caccgGTTGGCCAAGACGGGCGAGT            | aaacACTCGCCCCGTCTTGGCCAACc          |
| <i>hCLCN3</i> gRNA #1    | caccgGAGTAGCGTCGGCGCCTATT            | aaacAATAGGCGCCGACGCTACTCCc          |
| <i>hCLCN3</i> gRNA #2    | caccgCGCCGACGCTACTCAGCGAG            | aaacCTCGCTGAGTAGCGTCGGCGc           |
| <i>hCLCN3</i> gRNA #3    | caccgGTGAGCTAATCGCTAATGAC            | aaacGTCATTAGCGATTAGCTCACc           |
| IVT <i>SNAP91</i> gRNA#3 | TAATACGACTCACTATAGTTGGCCAAGACGGGCG   | TTCTAGCTCTAAAACACTCGCCCGTCTTGGCCAA  |
| IVT <i>FUT9</i> gRNA #1  | TAATACGACTCACTATAGTACACGCGGAGATCCAG  | TTCTAGCTCTAAAACCTGGATCTCGCGCGTGTA   |
| IVT <i>FUT9</i> gRNA #2  | TAATACGACTCACTATAGACACGCGGAGATCCAGA  | TTCTAGCTCTAAAACCTGGATCTCGCGCGTGT    |
| IVT <i>FUT9</i> gRNA #3  | TAATACGACTCACTATAGATGTTATGCATTACACCA | TTCTAGCTCTAAAACCTGGTGTAAATGCATAACAT |
| IVT <i>FUT9</i> gRNA #4  | TAATACGACTCACTATAGCCAGATATTGGTTAGCAA | TTCTAGCTCTAAAACCTTGCTAACCAATATCTGG  |
| IVT <i>FUT9</i> gRNA #5  | TAATACGACTCACTATAGATCCATTGTTGTAACCAG | TTCTAGCTCTAAAACCTGGTTACAACAATGGAT   |
| IVT <i>FUT9</i> gRNA #6  | TAATACGACTCACTATAGATTACTTGATGGGCTGGG | TTCTAGCTCTAAAACCCAGCCCATCAAGTAAT    |
| IVT <i>FUT9</i> gRNA #7  | TAATACGACTCACTATAGGGGTATAGCTGCAAAAAG | TTCTAGCTCTAAAACCTTTTGCAGCTATACCC    |
| IVT <i>FUT9</i> gRNA #8  | TAATACGACTCACTATAGGCTGGGGATGTAAGCTGG | TTCTAGCTCTAAAACCCAGCTTACATCCCCAGC   |
| IVT <i>FUT9</i> gRNA #9  | TAATACGACTCACTATAGGGTAATTGGGGATAGACA | TTCTAGCTCTAAAACCTGTCTATCCCCAATTACC  |
| IVT <i>FUT9</i> gRNA #10 | TAATACGACTCACTATAGACAGTGGGTGAATTTGCA | TTCTAGCTCTAAAACCTGCAAATTCACCCACTGT  |

IVT *CEP162* gRNA #1  
IVT *CEP162* gRNA #2  
IVT *CEP162* gRNA #3  
IVT *CEP162* gRNA #4  
IVT *CEP162* gRNA #5  
IVT *CEP162* gRNA #6

TAATACGACTCACTATAGCAGATCATTTCAACCACT  
TAATACGACTCACTATAGGTGAAAACCCTTGAGGGG  
TAATACGACTCACTATAGAGATTGGCAAGTAAGGTG  
TAATACGACTCACTATAGAAAGGTCTGACAAAAGGG  
TAATACGACTCACTATAGAGACAGTGAAAACCCTTG  
TAATACGACTCACTATAGACAGTGAAAACCCTTGAG

TTCTAGCTCTAAAACAGTGGTTGAAATGATCTG  
TTCTAGCTCTAAAACCCCTCAAGGGTTTTTCAC  
TTCTAGCTCTAAAACCACCTTACTTGCCAATCT  
TTCTAGCTCTAAAACCCCTTTTGTGACACCTTT  
TTCTAGCTCTAAAACCAAGGGTTTTCACTGTCT  
TTCTAGCTCTAAAACCTCAAGGGTTTTCACTGT

**Negative Control (NC) gRNAs**

IVT *FUT9* NC gRNA #1  
IVT *FUT9* NC gRNA #2  
IVT *FUT9* NC gRNA #3  
IVT *FUT9* NC gRNA #4  
IVT *FUT9* NC gRNA #5  
IVT *FUT9* NC gRNA #6  
IVT *FUT9* NC gRNA #7  
IVT *FUT9* NC gRNA #8  
IVT *FUT9* NC gRNA #9  
IVT *FUT9* NC gRNA #10  
IVT *CEP162* NC gRNA #1  
IVT *CEP162* NC gRNA #2  
IVT *CEP162* NC gRNA #3  
IVT *CEP162* NC gRNA #4  
IVT *CEP162* NC gRNA #5  
IVT *CEP162* NC gRNA #6  
IVT *CEP162* NC gRNA #7  
IVT *CEP162* NC gRNA #8  
IVT *CEP162* NC gRNA #9  
IVT *CEP162* NC gRNA #10

TAATACGACTCACTATAGTCTCCCAAATAGTATCTG  
TAATACGACTCACTATAGATGCCACTCATCCAAACC  
TAATACGACTCACTATAGGAGTGCAACATGACCAAG  
TAATACGACTCACTATAGGAGTGGCATCAGTATCAG  
TAATACGACTCACTATAGAACAAAGACATTGACCCA  
TAATACGACTCACTATAGTACTGCTCTGTACCATGA  
TAATACGACTCACTATAGCCAACCACCACTTCAGCA  
TAATACGACTCACTATAGatATCTATGCCAAGATGG  
TAATACGACTCACTATAGAACCCTTCAGCAGGGAGT  
TAATACGACTCACTATAGTGGAAATATTTACCAAGG  
TAATACGACTCACTATAGGGGAAGAAGCGATCAGGG  
TAATACGACTCACTATAGCCACCACCACTTACCCAA  
TAATACGACTCACTATAGAAGATAGAACCCAGCTGA  
TAATACGACTCACTATAGAAAGGGATTAGCCTTAGG  
TAATACGACTCACTATAGCAAGATAGAACCCAGCTG  
TAATACGACTCACTATAGACAATAAAGGACGACCAA  
TAATACGACTCACTATAGCATGGAAGTCCCTCAGCT  
TAATACGACTCACTATAGGGAAGAAGCGATCAGGGA  
TAATACGACTCACTATAGTAGACTTTGCACACTGTG  
TAATACGACTCACTATAGACAGAAGTCCTACATACC

TTCTAGCTCTAAAACCAGATACTATTTGGGAGA  
TTCTAGCTCTAAAACGGTTTTGGATGAGTGGCAT  
TTCTAGCTCTAAAACCTTGGTCATGTTGCACTC  
TTCTAGCTCTAAAACCTGATACTGATGCCACTC  
TTCTAGCTCTAAAACCTGGGTCAATGTCTTTGTT  
TTCTAGCTCTAAAACCTCATGGTACAGAGCAGTA  
TTCTAGCTCTAAAACCTGCTGAAGTGGTGGTTGG  
TTCTAGCTCTAAAACCCATCTTGGCATAGATAT  
TTCTAGCTCTAAAACACTCCCTGCTGAAGTGGT  
TTCTAGCTCTAAAACCCCTTGGTAAATATTTCCA  
TTCTAGCTCTAAAACCCCTGATCGCTTCTTCCC  
TTCTAGCTCTAAAACCTTGGGTAAGTGGTGGTGG  
TTCTAGCTCTAAAACCTCAGCTGGGTTCTATCTT  
TTCTAGCTCTAAAACCCTAAGGCTAATCCCTTT  
TTCTAGCTCTAAAACCTGAGTGGTCTATCTTG  
TTCTAGCTCTAAAACCTGGTCGTCCTTTATTGT  
TTCTAGCTCTAAAACAGCTGAGGGACTTCCATG  
TTCTAGCTCTAAAACCTCCCTGATCGCTTCTTCC  
TTCTAGCTCTAAAACCACAGTGTGCAAAGTCTA  
TTCTAGCTCTAAAACGGTATGTAGGACTTCTGT

**SI Table 3. qPCR primer sequences.**

| mRNA Target                    | Oligo Sequence                                |                                                  |
|--------------------------------|-----------------------------------------------|--------------------------------------------------|
|                                | Forward                                       | Reverse                                          |
| <i>GAPDH</i><br><i>B-ACTIN</i> | AGGGCTGCTTTTAACTCTGGT<br>TGTCCCCCAACTTGAGATGT | CCCCACTTGATTTTGGAGGGA<br>TGTGCACTTTTATTCAACTGGTC |
| <i>KCTD13</i>                  | TAACAGGACACCTGCAAACG                          | CTGGATGATGCCATGTCTTG                             |
| <i>TAOK2</i>                   | AGTCTAGCTCTTCTCCCCGC                          | CCGCCAAGCCCGAGTG                                 |
| <i>NRXN1</i>                   | AGAAAGATGCCAAGCACCCA                          | CCCATGTCCAGGAGGAGTA                              |
| <i>SNAP91</i>                  | AGGACCCATTAGCGGATCTTAACA                      | GCTCCCTTTGAAACTCAGCATCAA                         |
| <i>CLCN3</i>                   | AATCATAGGTCAAGCAGAGGGTCC                      | CCACAGGCATATGGAGCAAATACC                         |
| <i>CEP162</i>                  | TGCCTTGGTGGATAACTGAA                          | GAGAGAGGTTCCACTGCTCTT                            |
| <i>FUT-9</i>                   | TGTCTACGTGCTTCCCATGA                          | AACAGCCCAGGATAATGCAG                             |
| <i>IVT SNAP91 #3</i>           | TTGGCCAAGACGGGCGAGT                           | CGACTCGGTGCCACTTTTTC                             |

**SI Table 4. Antibodies.**

| <b>Antibody</b> | <b>Species</b> | <b>Supplier</b> | <b>Product Number</b> | <b>Dilution</b>             |
|-----------------|----------------|-----------------|-----------------------|-----------------------------|
| GFAP            | Ck             | Aves Lab        | GFAP                  | 1:1000                      |
| EAAT1/GLAST     | Rb             | Boster Bio      | PA2185                | 1:100                       |
| S100 $\beta$    | Ms             | Sigma           | S2532                 | 1:1000                      |
| VIMENTIN        | Rb             | Cell Signaling  | #3932                 | 1:500                       |
| Cas9:AF-488     | Ms             | CST             | 34963S                | 5uL/1x10 <sup>6</sup> cells |

## **SUPPLEMENTAL EXPERIMENTAL PROCEDURES**

### ***hiPSC and NPC culture***

All hiPSC and NPC lines were derived and validated as previously described; full details of the donors of the fibroblasts and validation of the hiPSC and NPC lines available (Topol et al., 2016) (**SI Table 1**). NPCs were maintained at high density, grown on growth factor reduced Matrigel (BD Biosciences) coated plates in NPC media (Dulbecco's Modified Eagle Medium/Ham's F12 Nutrient Mixture (ThermoFisher Scientific), 1x N2, 1x B27-RA (ThermoFisher Scientific) and 20 ng/ml FGF2 and split 1:3 every week with Accutase (Millipore, Billerica, MA, USA). Routine (every 4 weeks) mycoplasma testing was conducted using the MycoAlert Mycoplasma detection kit (Lonza); all cells used in this study were consistently negative.

### ***Astrocyte differentiation***

Antibiotic-selected dCas9-effector NPCs were differentiated to astrocytes and maintained as previously described (TCW et al., 2017). Astrocytes were cultured in astrocyte medium (ScienCell: 1801, astrocyte medium (1801-b), 2% fetal bovine serum (0010), astrocyte growth supplement (1852) and 10U/ml penicillin/streptomycin solution (0503) on Matrigel. Immunocytochemistry and FACS were used to validate NPC-astrocytes. Vendors, catalog numbers and dilutions of all antibodies used are listed in **SI Table 4**.

### ***NGN2-induced neuronal differentiation***

NGN2-induced neurons were derived from dCas9-effector NPCs as previously described (Ho et al., 2015) using the human *NGN2*-Neo lentiviral expressing vector (Addgene #79049). gRNA lentiviruses generated as above were co-transduced with induction viruses and cultures were spininfected (1 hour, 1000xg, 25°C). Cells were harvested at 9 days or 21 days later.

## SUPPLEMENTAL REFERENCES

Brennand, K.J., Simone, A., Jou, J., Gelboin-Burkhardt, C., Tran, N., Sangar, S., Li, Y., Mu, Y., Chen, G., Yu, D., *et al.* (2011). Modelling schizophrenia using human induced pluripotent stem cells. *Nature* 473, 221-225.

Ho, S.M., Hartley, B.J., Tcw, J., Beaumont, M., Stafford, K., Slesinger, P.A., and Brennand, K.J. (2015). Rapid Ngn2-induction of excitatory neurons from hiPSC-derived neural progenitor cells. *Methods*.

TCW, J., Wang, M., Pimenova, A.A., Bowles, K.R., Hartley, B.J., Lacin, E., Machlovi, S., Abdelaal, R., Karch, C.M., Phetnani, H., *et al.* (2017). An efficient platform for astrocyte differentiation from human induced pluripotent stem cells. *bioRxiv*.

Topol, A., Zhu, S., Hartley, B.J., English, J., Hauberg, M.E., Tran, N., Rittenhouse, C.A., Simone, A., Ruderfer, D.M., Johnson, J., *et al.* (2016). Dysregulation of miRNA-9 in a Subset of Schizophrenia Patient-Derived Neural Progenitor Cells. *Cell reports* 15, 1024-1036.
